# Supplementary material for: Pharmacogenomics to Improve Supportive Care Symptoms. A Prospective Observational Study Protocol
Source: Research Square preprint supplement (doi:10.21203/rs.3.rs-7723169/v1), 2025-11-05

## Study Team

|                     |                                        |
|---------------------|----------------------------------------|
| Chief Investigators | Dr Martyn Patel<br>Dr Caroline Barry   |
| Co-Investigators    | Dr William Newman<br>Dr John McDermott |
| Study Sponsor       | NNUHFT                                 |

## Contact Information

**Email:** [piscs@nnuh.nhs.uk](mailto:piscs@nnuh.nhs.uk)

**Phone:** 01603 286286 ex 4397/4177

## Complaints

If you have any concerns or wish to make a complaint to someone independent from the study team please contact the patient advisory liaison service:

[palsandcomplaints@nnuh.nhs.uk](mailto:palsandcomplaints@nnuh.nhs.uk)

The PALS and Complaints Manager Norfolk and Norwich University Hospital,  
Colney Lane, Norwich NR4 7UY

**01603 289036**

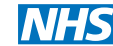

Norfolk and Norwich  
University Hospitals  
NHS Foundation Trust

## How do I join the Study?

**Either:**

**Call:** 01603 286286 ext 4397/4177

**Email:** [piscs@nnuh.nhs.uk](mailto:piscs@nnuh.nhs.uk)

**Complete the slip below and return to:**

Dr Martyn Patel, Older Persons Medicine,  
Norfolk and Norwich University Hospitals  
NHS Trust, Colney Lane, Norwich, NR4 7UY

### Expression of Interest:

**Name:**

**Phone Number:**

**Email Address:**

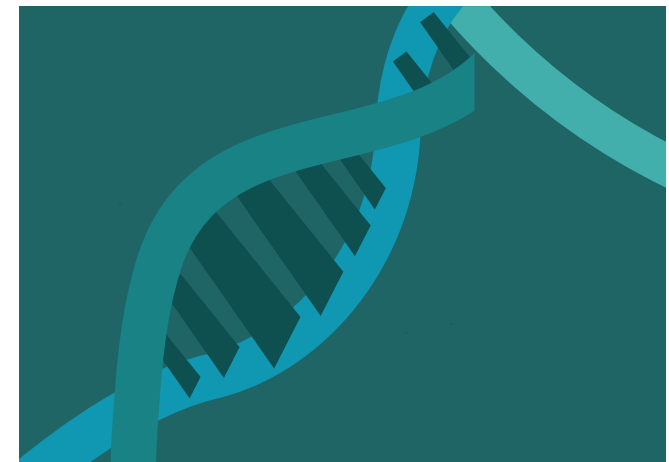

# The PISCES Study

Personalisation to  
Improve Supportive  
Care Symptoms

Participation Information Leaflet

## What is the PISCES Study?

The PISCES study aims to explore how common genetic changes may help improve decisions about prescribing medications, particularly for serious illnesses.

This research focuses on understanding whether genetic testing before prescribing medications could improve treatment effectiveness and safety.

## Why am I being Invited?

You are invited to participate because you have a life-threatening or life-limiting illness.

We are studying how genetic factors may affect how effective certain medications are.

## What is required?

- **Consent & a Blood Sample:**

If you participate you will need to sign a consent form and provide a blood sample.

- **Genetic Analysis:**

Your blood sample will be analysed for genetic changes affecting medication.

- **Medical Data:**

We will collect data from your prescribing records, linked only to a study ID to protect your privacy.

## Time Commitment

The entire process should take around 30 minutes. You won't need to attend future visits unless you choose to participate in additional studies.

## What are the risks?

There are no known significant risks to participating. However, as with any medical research, there is a small chance of discomfort from the blood sample collection.

## What happens after the study?

**Results:** The findings will be published in medical journals, and a summary will be sent to participants who consent to receive it.

**Future Use of Data:** Your blood sample will be analysed for genetic changes affecting medication.

## What happens to my information?

Your blood sample will be tested for genetic changes and stored securely.

Your medication history will be linked to your genetic data to explore how genetics influence medication effectiveness.

## Data Protection and Confidentiality

- In this research study we will use information from your medical records to gather information about medications prescribed.
- We will only use information that we need for the research study. We will let very few people know your name or contact details, and only if they really need it for this study.
- Everyone involved in this study will keep your data safe and secure. We will also follow all privacy rules.
- At the end of the study we will save some of the data in case we need to check it.
- We will make sure no-one can work out who you are from the reports we write.
- The information pack tells you more about this.

## Voluntary Participation and Withdrawal

- Participation is entirely voluntary. You can withdraw at any time without impact on your care.
- If you decide not to participate, there is nothing further you need to do.

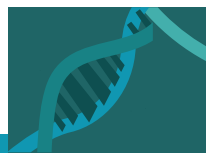

Supplement: Supplementary file 1 [file a96ea7f9c0165f2a968f5519.pdf]
